# Supplementary material
Source: Springer Nature journal article supplement (https://www.springermedizin.de/resource/supplementary/12974_2011_411_MOESM7_ESM.pdf/9601238)

**PPCSE**

**bEnd.3  
cell**

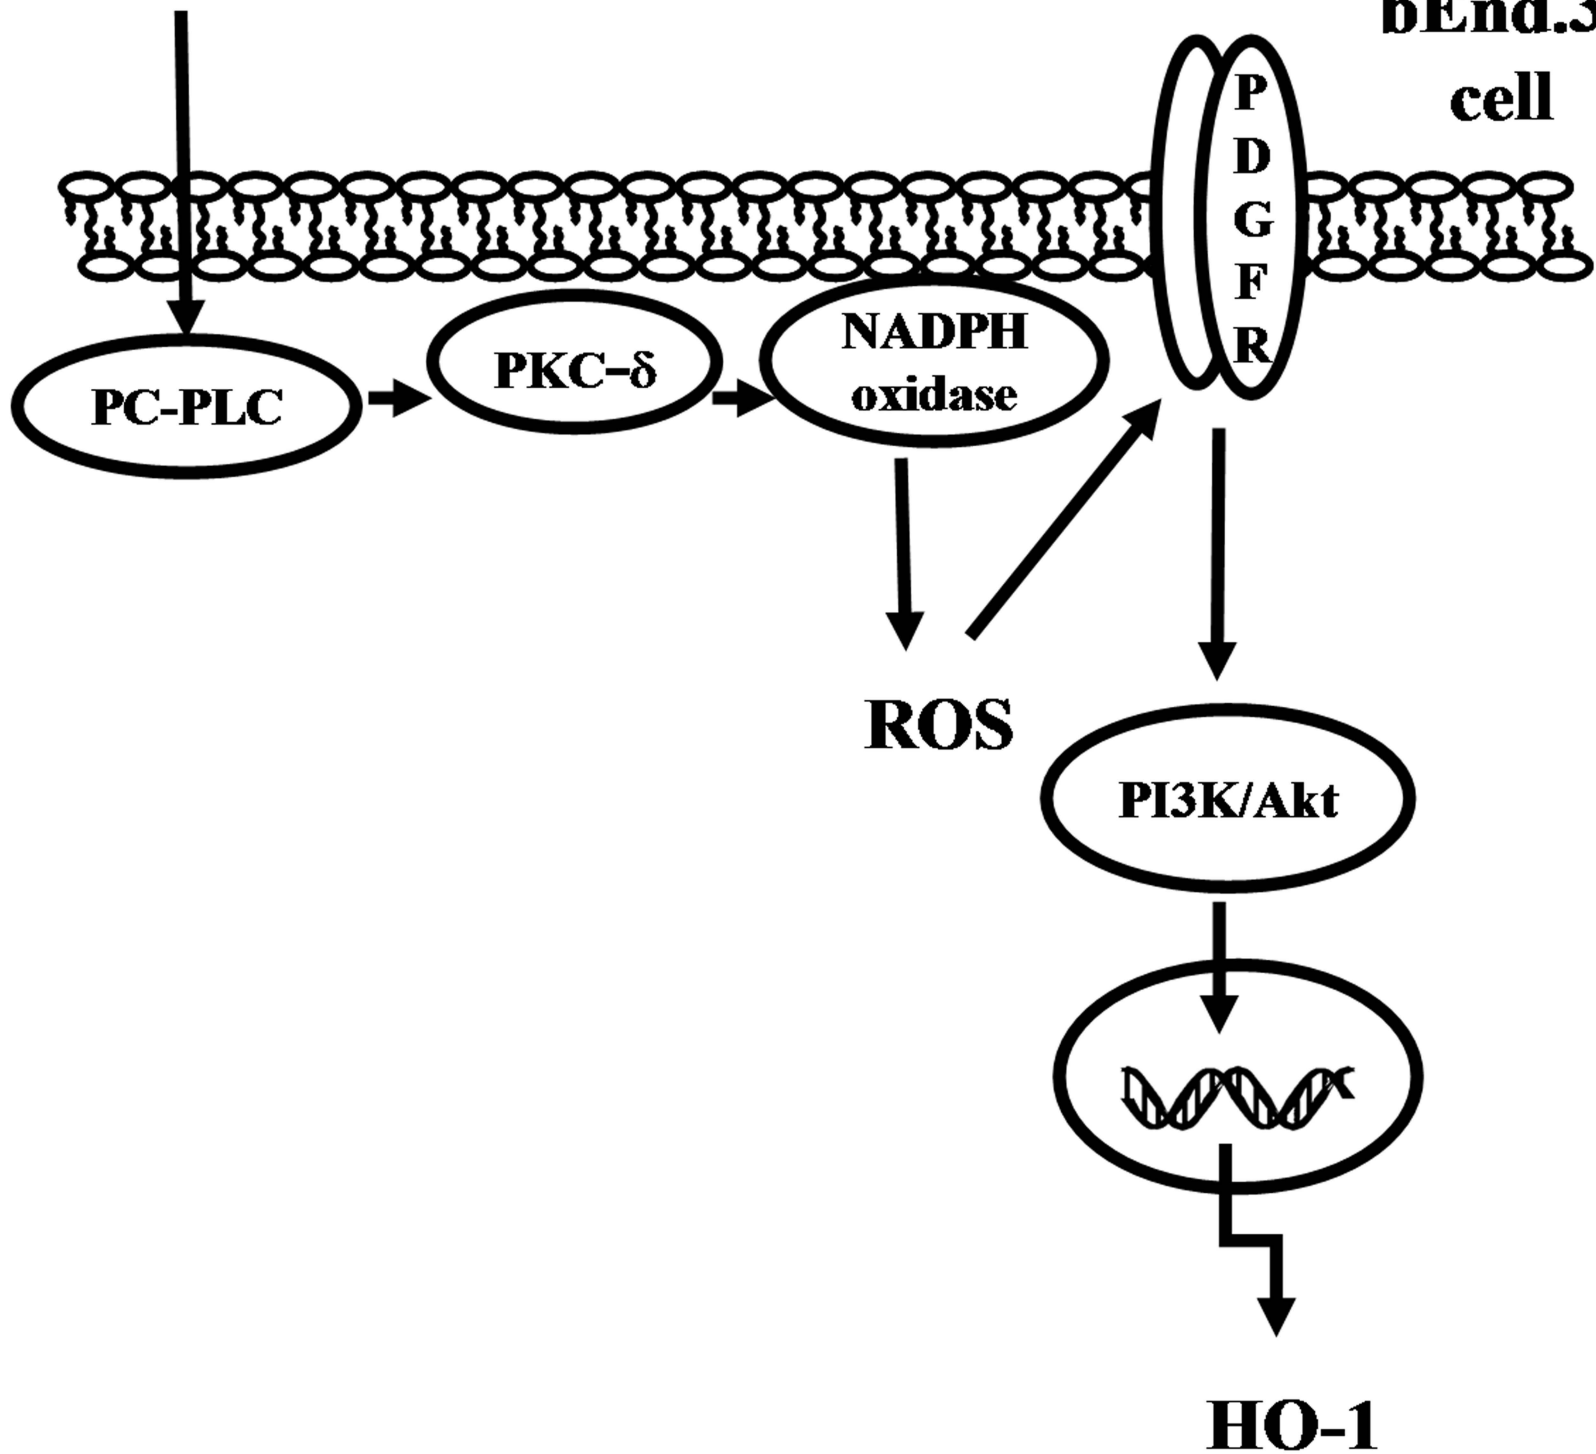

Supplement: MOESM7 [file 9601238]
